# Supplementary material for: Inferring Human Colonization History Using a Copying Model
Source: PubMed Central journal article supplement (PMC2367454; doi:10.1371/journal.pgen.1000078), 2008-05-23

# Number of Individuals vs Total Number of Donors

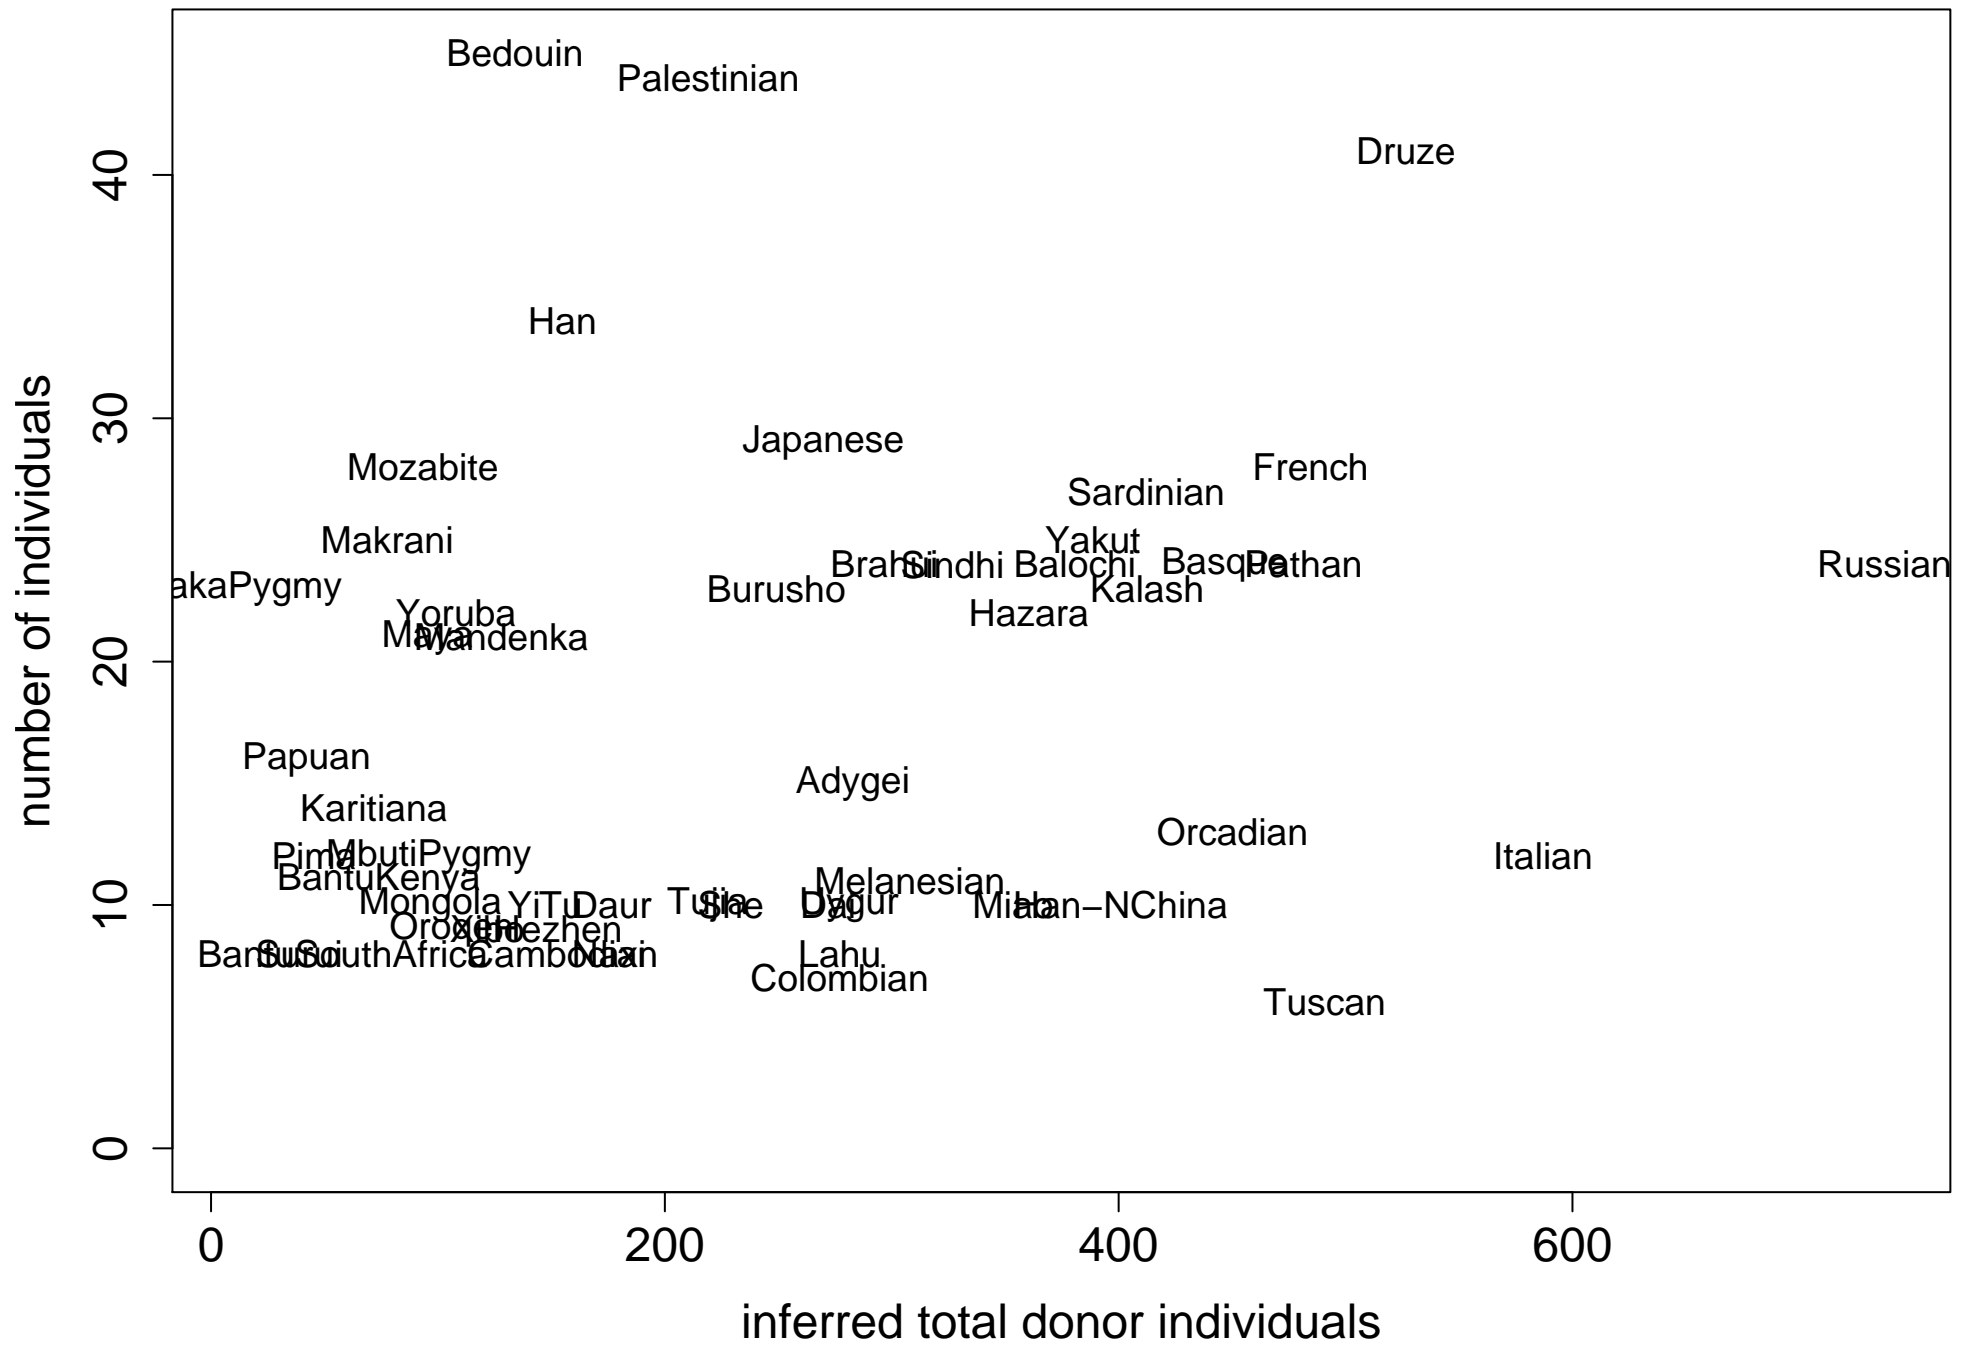

Supplement: pgen.1000078.s001.pdf [file pgen.1000078.s001.pdf]
