# Supplementary material for: Inferring Human Colonization History Using a Copying Model
Source: PLoS Genet. 2008 May 23;4(5):e1000078. doi: 10.1371/journal.pgen.1000078 (PMC2367454; doi:10.1371/journal.pgen.1000078)
Supplement: Table S3 — Ancestry of particular populations. For each recipient population, gives proportion of donor chromosomes that went via each existing population. Values were estimated recursively, working backwards from the labelled population to the first (San) by assuming that the amount of genetic material passed on by each population was proportional to the number of donor individuals it contributed. (0.09 MB XLS) [file pgen.1000078.s005.xls]

## Sheet: PercentageContributionsSummary
sink.pop	source.pop	total.contribution
San	NA	NA
BiakaPygmy	San	1
BantuSouthAfrica	BiakaPygmy	0.793103
BantuSouthAfrica	San	1
BantuKenya	BiakaPygmy	0.793103
BantuKenya	BantuSouthAfrica	0.216216
BantuKenya	San	1
MbutiPygmy	BiakaPygmy	0.793103
MbutiPygmy	BantuKenya	0.229167
MbutiPygmy	BantuSouthAfrica	0.216216
MbutiPygmy	San	1
Yoruba	BiakaPygmy	0.881226
Yoruba	MbutiPygmy	0.222222
Yoruba	BantuKenya	0.25463
Yoruba	BantuSouthAfrica	0.24024
Yoruba	San	1
Mandenka	BiakaPygmy	0.897761
Mandenka	Yoruba	0.343809
Mandenka	BantuKenya	0.259449
Mandenka	BantuSouthAfrica	0.244644
Mandenka	San	1
Mandenka	MbutiPygmy	0.0764021
Mozabite	Yoruba	0.561389
Mozabite	BantuKenya	0.425207
Mozabite	Mandenka	0.322846
Mozabite	BiakaPygmy	0.866581
Mozabite	MbutiPygmy	0.124753
Mozabite	BantuSouthAfrica	0.236214
Mozabite	San	1
Makrani	Mozabite	0.720735
Makrani	BantuKenya	0.585727
Makrani	Yoruba	0.404612
Makrani	Mandenka	0.232687
Makrani	BiakaPygmy	0.846062
Makrani	MbutiPygmy	0.0899139
Makrani	BantuSouthAfrica	0.23063
Makrani	San	1
Bedouin	Mozabite	0.750299
Bedouin	Makrani	0.407609
Bedouin	BantuKenya	0.568733
Bedouin	Yoruba	0.42121
Bedouin	Mandenka	0.242232
Bedouin	BiakaPygmy	0.848234
Bedouin	MbutiPygmy	0.0936022
Bedouin	BantuSouthAfrica	0.231221
Bedouin	San	1
Palestinian	Bedouin	0.4274
Palestinian	Mozabite	0.757438
Palestinian	Makrani	0.411224
Palestinian	BantuKenya	0.56463
Palestinian	Yoruba	0.425218
Palestinian	Mandenka	0.244536
Palestinian	BiakaPygmy	0.848758
Palestinian	MbutiPygmy	0.0944928
Palestinian	BantuSouthAfrica	0.231364
Palestinian	San	1
Adygei	Bedouin	0.447595
Adygei	Palestinian	0.312004
Adygei	Mozabite	0.796369
Adygei	Makrani	0.433585
Adygei	BantuKenya	0.542253
Adygei	Yoruba	0.447073
Adygei	Mandenka	0.257105
Adygei	BiakaPygmy	0.851619
Adygei	MbutiPygmy	0.0993495
Adygei	BantuSouthAfrica	0.232142
Adygei	San	1
Uygur	Makrani	0.492601
Uygur	Adygei	0.114888
Uygur	Bedouin	0.493983
Uygur	Palestinian	0.333927
Uygur	Mozabite	0.772058
Uygur	BantuKenya	0.556227
Uygur	Yoruba	0.433425
Uygur	Mandenka	0.249256
Uygur	BiakaPygmy	0.849833
Uygur	MbutiPygmy	0.0963166
Uygur	BantuSouthAfrica	0.231656
Uygur	San	1
Brahui	Bedouin	0.54276
Brahui	Palestinian	0.37432
Brahui	Makrani	0.524248
Brahui	Adygei	0.116211
Brahui	Uygur	0.0719624
Brahui	Mozabite	0.75378
Brahui	BantuKenya	0.566733
Brahui	Yoruba	0.423163
Brahui	Mandenka	0.243355
Brahui	BiakaPygmy	0.84849
Brahui	MbutiPygmy	0.0940363
Brahui	BantuSouthAfrica	0.23129
Brahui	San	1
Burusho	Palestinian	0.437369
Burusho	Makrani	0.545879
Burusho	Brahui	0.174698
Burusho	Adygei	0.137613
Burusho	Uygur	0.0853626
Burusho	Bedouin	0.461615
Burusho	Mozabite	0.754373
Burusho	BantuKenya	0.566392
Burusho	Yoruba	0.423496
Burusho	Mandenka	0.243547
Burusho	BiakaPygmy	0.848533
Burusho	MbutiPygmy	0.0941103
Burusho	BantuSouthAfrica	0.231302
Burusho	San	1
Sindhi	Palestinian	0.461048
Sindhi	Makrani	0.537581
Sindhi	Brahui	0.181779
Sindhi	Burusho	0.149222
Sindhi	Adygei	0.143403
Sindhi	Uygur	0.0888225
Sindhi	Bedouin	0.401915
Sindhi	BantuSouthAfrica	0.257677
Sindhi	Mozabite	0.728851
Sindhi	BantuKenya	0.546761
Sindhi	Yoruba	0.409169
Sindhi	Mandenka	0.235307
Sindhi	BiakaPygmy	0.846658
Sindhi	MbutiPygmy	0.0909264
Sindhi	San	1
Balochi	Makrani	0.527211
Balochi	Brahui	0.165876
Balochi	Sindhi	0.122944
Balochi	Burusho	0.136167
Balochi	Adygei	0.12652
Balochi	Uygur	0.0804226
Balochi	Bedouin	0.494659
Balochi	Palestinian	0.359176
Balochi	Mozabite	0.756325
Balochi	BantuKenya	0.561053
Balochi	Yoruba	0.424593
Balochi	Mandenka	0.244177
Balochi	BiakaPygmy	0.848677
Balochi	MbutiPygmy	0.0943539
Balochi	BantuSouthAfrica	0.234647
Balochi	San	1
French	Palestinian	0.355991
French	Bedouin	0.466889
French	Makrani	0.481893
French	Sindhi	0.105912
French	Brahui	0.142395
French	Balochi	0.0938264
French	Burusho	0.117039
French	Adygei	0.112167
French	Uygur	0.0691401
French	Mozabite	0.77356
French	BantuKenya	0.55173
French	Yoruba	0.434268
French	Mandenka	0.249741
French	BiakaPygmy	0.849943
French	MbutiPygmy	0.096504
French	BantuSouthAfrica	0.234533
French	San	1
Hazara	French	0.159504
Hazara	Makrani	0.575044
Hazara	Sindhi	0.169039
Hazara	Brahui	0.226414
Hazara	Burusho	0.187109
Hazara	Adygei	0.176849
Hazara	Uygur	0.110501
Hazara	Balochi	0.133959
Hazara	Palestinian	0.353474
Hazara	Bedouin	0.404484
Hazara	Mozabite	0.754035
Hazara	BantuKenya	0.560788
Hazara	Yoruba	0.423307
Hazara	Mandenka	0.243438
Hazara	BiakaPygmy	0.848508
Hazara	MbutiPygmy	0.0940682
Hazara	BantuSouthAfrica	0.23584
Hazara	San	1
Cambodian	Burusho	0.397074
Cambodian	Hazara	0.298315
Cambodian	Uygur	0.212673
Cambodian	Sindhi	0.247323
Cambodian	Mozabite	0.765723
Cambodian	Palestinian	0.377909
Cambodian	Makrani	0.514434
Cambodian	Brahui	0.157818
Cambodian	Adygei	0.139489
Cambodian	Bedouin	0.410748
Cambodian	BantuKenya	0.551384
Cambodian	Yoruba	0.429869
Cambodian	Mandenka	0.247211
Cambodian	BiakaPygmy	0.849367
Cambodian	MbutiPygmy	0.0955263
Cambodian	BantuSouthAfrica	0.238178
Cambodian	San	1
Cambodian	French	0.0475825
Cambodian	Balochi	0.039962
Tuscan	Bedouin	0.480046
Tuscan	Palestinian	0.365109
Tuscan	French	0.112816
Tuscan	Balochi	0.10741
Tuscan	Burusho	0.129737
Tuscan	Adygei	0.114248
Tuscan	Makrani	0.483825
Tuscan	Sindhi	0.10056
Tuscan	Mozabite	0.770781
Tuscan	Brahui	0.136237
Tuscan	Hazara	0.0600402
Tuscan	BantuKenya	0.553511
Tuscan	Yoruba	0.432708
Tuscan	Mandenka	0.248844
Tuscan	BiakaPygmy	0.849739
Tuscan	MbutiPygmy	0.0961574
Tuscan	BantuSouthAfrica	0.234334
Tuscan	San	1
Tuscan	Uygur	0.0389806
Pathan	French	0.125278
Pathan	Makrani	0.543568
Pathan	Brahui	0.184782
Pathan	Balochi	0.119306
Pathan	Sindhi	0.139446
Pathan	Burusho	0.159026
Pathan	Hazara	0.0949927
Pathan	Adygei	0.141668
Pathan	Uygur	0.0914976
Pathan	Cambodian	0.0271405
Pathan	Palestinian	0.367341
Pathan	Bedouin	0.467112
Pathan	Tuscan	0.0147658
Pathan	Mozabite	0.754365
Pathan	BantuKenya	0.561613
Pathan	Yoruba	0.423492
Pathan	Mandenka	0.243544
Pathan	BiakaPygmy	0.848533
Pathan	MbutiPygmy	0.0941094
Pathan	BantuSouthAfrica	0.235051
Pathan	San	1
Mongola	Hazara	0.496153
Mongola	Uygur	0.288082
Mongola	Cambodian	0.161835
Mongola	Pathan	0.229819
Mongola	French	0.104448
Mongola	Makrani	0.542989
Mongola	Sindhi	0.142863
Mongola	Brahui	0.163906
Mongola	Burusho	0.178396
Mongola	Adygei	0.151384
Mongola	Balochi	0.0909583
Mongola	Palestinian	0.356814
Mongola	Bedouin	0.436559
Mongola	Mozabite	0.759294
Mongola	BantuKenya	0.558663
Mongola	Yoruba	0.426259
Mongola	Mandenka	0.245135
Mongola	BiakaPygmy	0.848895
Mongola	MbutiPygmy	0.0947243
Mongola	BantuSouthAfrica	0.235242
Mongola	San	1
Mongola	Tuscan	0.00339346
Oroqen	Hazara	0.584402
Oroqen	Mongola	0.201239
Oroqen	Uygur	0.341688
Oroqen	Cambodian	0.193559
Oroqen	French	0.0983077
Oroqen	Makrani	0.542245
Oroqen	Sindhi	0.142357
Oroqen	Brahui	0.157228
Oroqen	Burusho	0.181505
Oroqen	Adygei	0.153241
Oroqen	Balochi	0.083215
Oroqen	Palestinian	0.354146
Oroqen	Bedouin	0.429958
Oroqen	Mozabite	0.760602
Oroqen	BantuKenya	0.557928
Oroqen	Yoruba	0.426994
Oroqen	Mandenka	0.245558
Oroqen	BiakaPygmy	0.848991
Oroqen	MbutiPygmy	0.0948875
Oroqen	BantuSouthAfrica	0.235254
Oroqen	San	1
Oroqen	Pathan	0.0462486
Oroqen	Tuscan	0.000682896
Xibo	Hazara	0.585917
Xibo	Mongola	0.200506
Xibo	Uygur	0.340845
Xibo	Oroqen	0.152784
Xibo	Cambodian	0.192853
Xibo	French	0.0985307
Xibo	Makrani	0.542365
Xibo	Sindhi	0.142454
Xibo	Brahui	0.15748
Xibo	Burusho	0.181525
Xibo	Adygei	0.153327
Xibo	Balochi	0.0833999
Xibo	Palestinian	0.354144
Xibo	Bedouin	0.429865
Xibo	Mozabite	0.760578
Xibo	BantuKenya	0.557939
Xibo	Yoruba	0.42698
Xibo	Mandenka	0.24555
Xibo	BiakaPygmy	0.848989
Xibo	MbutiPygmy	0.0948845
Xibo	BantuSouthAfrica	0.235256
Xibo	San	1
Xibo	Pathan	0.04608
Xibo	Tuscan	0.000680407
Yi	Hazara	0.586619
Yi	Mongola	0.200277
Yi	Uygur	0.340378
Yi	Oroqen	0.152609
Yi	Xibo	0.132383
Yi	Cambodian	0.192633
Yi	French	0.0986369
Yi	Makrani	0.542421
Yi	Sindhi	0.142524
Yi	Brahui	0.157611
Yi	Burusho	0.181574
Yi	Adygei	0.153368
Yi	Balochi	0.0834884
Yi	Palestinian	0.354147
Yi	Bedouin	0.429815
Yi	Mozabite	0.760567
Yi	BantuKenya	0.557943
Yi	Yoruba	0.426974
Yi	Mandenka	0.245546
Yi	BiakaPygmy	0.848988
Yi	MbutiPygmy	0.094883
Yi	BantuSouthAfrica	0.235258
Yi	San	1
Yi	Pathan	0.0460275
Yi	Tuscan	0.000679631
Druze	Bedouin	0.456961
Druze	Palestinian	0.333354
Druze	French	0.126134
Druze	Mozabite	0.782535
Druze	Makrani	0.465601
Druze	Adygei	0.106102
Druze	Tuscan	0.0195438
Druze	Balochi	0.10627
Druze	Pathan	0.0697968
Druze	Brahui	0.0902872
Druze	Sindhi	0.06219
Druze	Hazara	0.0300509
Druze	Burusho	0.061499
Druze	BantuKenya	0.548071
Druze	Yoruba	0.439307
Druze	Mandenka	0.252639
Druze	BiakaPygmy	0.850603
Druze	MbutiPygmy	0.0976237
Druze	BantuSouthAfrica	0.233537
Druze	San	1
Druze	Uygur	0.0298596
Druze	Cambodian	0.00189432
Italian	Palestinian	0.371891
Italian	Druze	0.142814
Italian	French	0.128328
Italian	Pathan	0.0928588
Italian	Adygei	0.116917
Italian	Uygur	0.0623954
Italian	Tuscan	0.0249314
Italian	Bedouin	0.482528
Italian	Mozabite	0.781003
Italian	Brahui	0.131193
Italian	Burusho	0.107004
Italian	Sindhi	0.0779102
Italian	Makrani	0.447108
Italian	BantuKenya	0.548413
Italian	Yoruba	0.438446
Italian	Mandenka	0.252144
Italian	BiakaPygmy	0.85049
Italian	MbutiPygmy	0.0974325
Italian	BantuSouthAfrica	0.233929
Italian	San	1
Italian	Balochi	0.0364674
Italian	Hazara	0.0134215
Italian	Cambodian	0.00252024
Sardinian	Palestinian	0.425645
Sardinian	French	0.171047
Sardinian	Adygei	0.133146
Sardinian	Italian	0.0581409
Sardinian	Tuscan	0.034165
Sardinian	Druze	0.193946
Sardinian	Bedouin	0.48732
Sardinian	Balochi	0.13794
Sardinian	Mozabite	0.784419
Sardinian	Uygur	0.055393
Sardinian	Makrani	0.423079
Sardinian	BantuKenya	0.54755
Sardinian	Yoruba	0.440364
Sardinian	Mandenka	0.253247
Sardinian	BiakaPygmy	0.850741
Sardinian	MbutiPygmy	0.0978587
Sardinian	BantuSouthAfrica	0.233135
Sardinian	San	1
Sardinian	Sindhi	0.0458077
Sardinian	Brahui	0.0644519
Sardinian	Burusho	0.0510667
Sardinian	Pathan	0.0183562
Sardinian	Hazara	0.00810548
Sardinian	Cambodian	0.000498196
Tu	Yi	0.144777
Tu	Mongola	0.220583
Tu	Xibo	0.148477
Tu	Oroqen	0.168525
Tu	Cambodian	0.215569
Tu	Hazara	0.580619
Tu	Uygur	0.329964
Tu	French	0.0981938
Tu	Makrani	0.542064
Tu	Sindhi	0.146576
Tu	Brahui	0.159074
Tu	Burusho	0.188895
Tu	Adygei	0.153233
Tu	Balochi	0.083182
Tu	Palestinian	0.355048
Tu	Bedouin	0.428977
Tu	Mozabite	0.760578
Tu	BantuKenya	0.557797
Tu	Yoruba	0.42698
Tu	Mandenka	0.24555
Tu	BiakaPygmy	0.848989
Tu	MbutiPygmy	0.0948845
Tu	BantuSouthAfrica	0.235367
Tu	San	1
Tu	Pathan	0.0506943
Tu	Tuscan	0.00074854
Russian	Druze	0.127648
Russian	French	0.125594
Russian	Sardinian	0.0712973
Russian	Sindhi	0.114096
Russian	Burusho	0.128675
Russian	Hazara	0.0924699
Russian	Adygei	0.129035
Russian	Italian	0.0358926
Russian	Uygur	0.0846695
Russian	Tuscan	0.0220371
Russian	Palestinian	0.38397
Russian	Bedouin	0.494186
Russian	Balochi	0.105235
Russian	Makrani	0.504749
Russian	Brahui	0.136451
Russian	Pathan	0.0600062
Russian	Mongola	0.027094
Russian	Yi	0.0191639
Russian	Tu	0.0115775
Russian	Mozabite	0.761239
Russian	BantuKenya	0.558532
Russian	Yoruba	0.427351
Russian	Mandenka	0.245763
Russian	BiakaPygmy	0.849038
Russian	MbutiPygmy	0.0949669
Russian	BantuSouthAfrica	0.234507
Russian	San	1
Russian	Cambodian	0.0107287
Russian	Oroqen	0.00461989
Russian	Xibo	0.00403407
Kalash	Sindhi	0.181205
Kalash	Pathan	0.12685
Kalash	Burusho	0.201688
Kalash	Russian	0.111214
Kalash	Adygei	0.179502
Kalash	Uygur	0.11812
Kalash	Balochi	0.138867
Kalash	Brahui	0.206638
Kalash	French	0.117182
Kalash	Hazara	0.083991
Kalash	Italian	0.04274
Kalash	Makrani	0.53213
Kalash	Palestinian	0.389255
Kalash	Bedouin	0.448675
Kalash	BantuSouthAfrica	0.236229
Kalash	Mozabite	0.757106
Kalash	BantuKenya	0.558605
Kalash	Yoruba	0.425031
Kalash	Mandenka	0.244429
Kalash	BiakaPygmy	0.848734
Kalash	MbutiPygmy	0.0944513
Kalash	San	1
Kalash	Cambodian	0.00445485
Kalash	Tuscan	0.00513826
Kalash	Druze	0.0197301
Kalash	Sardinian	0.00792927
Kalash	Mongola	0.00301323
Kalash	Yi	0.0021313
Kalash	Tu	0.00128758
Kalash	Oroqen	0.000513797
Kalash	Xibo	0.000448646
Naxi	Hazara	0.587933
Naxi	Yi	0.13319
Naxi	Tu	0.111064
Naxi	Uygur	0.336694
Naxi	Mongola	0.198764
Naxi	Xibo	0.136477
Naxi	Oroqen	0.152833
Naxi	Cambodian	0.197993
Naxi	French	0.0988081
Naxi	Makrani	0.542499
Naxi	Sindhi	0.14376
Naxi	Brahui	0.158336
Naxi	Burusho	0.183603
Naxi	Adygei	0.153475
Naxi	Balochi	0.0836273
Naxi	Palestinian	0.354367
Naxi	Bedouin	0.429401
Naxi	Mozabite	0.760543
Naxi	BantuKenya	0.557914
Naxi	Yoruba	0.426961
Naxi	Mandenka	0.245539
Naxi	BiakaPygmy	0.848987
Naxi	MbutiPygmy	0.0948801
Naxi	BantuSouthAfrica	0.235291
Naxi	San	1
Naxi	Pathan	0.0456797
Naxi	Tuscan	0.000674497
Daur	Hazara	0.591477
Daur	Tu	0.117028
Daur	Yi	0.133155
Daur	Uygur	0.337887
Daur	Xibo	0.140203
Daur	Mongola	0.197764
Daur	Oroqen	0.154341
Daur	Cambodian	0.190023
Daur	French	0.0993481
Daur	Makrani	0.542804
Daur	Sindhi	0.142763
Daur	Brahui	0.158382
Daur	Burusho	0.181516
Daur	Adygei	0.153641
Daur	Balochi	0.0840775
Daur	Palestinian	0.354125
Daur	Bedouin	0.429538
Daur	Mozabite	0.760491
Daur	BantuKenya	0.557979
Daur	Yoruba	0.426931
Daur	Mandenka	0.245522
Daur	BiakaPygmy	0.848983
Daur	MbutiPygmy	0.0948736
Daur	BantuSouthAfrica	0.235263
Daur	San	1
Daur	Pathan	0.0454499
Daur	Tuscan	0.000671103
Orcadian	French	0.203974
Orcadian	Sardinian	0.139316
Orcadian	Russian	0.126153
Orcadian	Sindhi	0.181393
Orcadian	Adygei	0.178243
Orcadian	Italian	0.0734539
Orcadian	Tuscan	0.0380546
Orcadian	Kalash	0.101283
Orcadian	Pathan	0.0957831
Orcadian	Makrani	0.508176
Orcadian	Bedouin	0.463926
Orcadian	Palestinian	0.371108
Orcadian	Druze	0.0717763
Orcadian	Balochi	0.0905743
Orcadian	Burusho	0.115774
Orcadian	Brahui	0.115749
Orcadian	Uygur	0.0623169
Orcadian	Mozabite	0.762981
Orcadian	BantuKenya	0.555222
Orcadian	Yoruba	0.428329
Orcadian	Mandenka	0.246326
Orcadian	BiakaPygmy	0.849166
Orcadian	MbutiPygmy	0.0951842
Orcadian	BantuSouthAfrica	0.236351
Orcadian	San	1
Orcadian	Hazara	0.0296177
Orcadian	Cambodian	0.00374761
Orcadian	Mongola	0.00341799
Orcadian	Yi	0.00241759
Orcadian	Tu	0.00146054
Orcadian	Oroqen	0.000582814
Orcadian	Xibo	0.000508912
Hezhen	Daur	0.141009
Hezhen	Yi	0.183201
Hezhen	Mongola	0.281975
Hezhen	Tu	0.157487
Hezhen	Xibo	0.188699
Hezhen	Oroqen	0.215554
Hezhen	Naxi	0.109332
Hezhen	Cambodian	0.240667
Hezhen	Orcadian	0.0520202
Hezhen	Hazara	0.524652
Hezhen	Uygur	0.307947
Hezhen	French	0.101181
Hezhen	Makrani	0.538673
Hezhen	Sindhi	0.152855
Hezhen	Brahui	0.156585
Hezhen	Burusho	0.194512
Hezhen	Adygei	0.153409
Hezhen	Balochi	0.0816894
Hezhen	Palestinian	0.357237
Hezhen	Bedouin	0.430916
Hezhen	Mozabite	0.760894
Hezhen	BantuKenya	0.5574
Hezhen	Yoruba	0.427158
Hezhen	Mandenka	0.245652
Hezhen	BiakaPygmy	0.849012
Hezhen	MbutiPygmy	0.0949239
Hezhen	BantuSouthAfrica	0.235542
Hezhen	San	1
Hezhen	Pathan	0.0697452
Hezhen	Tuscan	0.00293587
Hezhen	Sardinian	0.00724725
Hezhen	Russian	0.00656251
Hezhen	Italian	0.00382108
Hezhen	Kalash	0.00526875
Hezhen	Druze	0.00373381
Han	Yi	0.192452
Han	Daur	0.136086
Han	Mongola	0.286809
Han	Tu	0.160376
Han	Xibo	0.191419
Han	Oroqen	0.216849
Han	Cambodian	0.282846
Han	Naxi	0.10793
Han	Hazara	0.541737
Han	Uygur	0.317107
Han	French	0.093668
Han	Makrani	0.539331
Han	Sindhi	0.155047
Han	Brahui	0.158791
Han	Burusho	0.206587
Han	Adygei	0.151551
Han	Balochi	0.0795955
Han	Palestinian	0.357319
Han	Bedouin	0.428397
Han	Mozabite	0.760972
Han	BantuKenya	0.557281
Han	Yoruba	0.427201
Han	Mandenka	0.245677
Han	BiakaPygmy	0.849018
Han	MbutiPygmy	0.0949336
Han	BantuSouthAfrica	0.235603
Han	San	1
Han	Pathan	0.0659142
Han	Tuscan	0.000973274
Tujia	Han	0.311551
Tujia	Mongola	0.296818
Tujia	Yi	0.201015
Tujia	Tu	0.172365
Tujia	Hezhen	0.0826242
Tujia	Daur	0.13636
Tujia	Naxi	0.116185
Tujia	Xibo	0.193013
Tujia	Cambodian	0.273668
Tujia	Oroqen	0.19242
Tujia	Hazara	0.541344
Tujia	Uygur	0.316479
Tujia	French	0.0947147
Tujia	Makrani	0.539479
Tujia	Sindhi	0.154199
Tujia	Brahui	0.15871
Tujia	Burusho	0.204153
Tujia	Adygei	0.151782
Tujia	Balochi	0.0801599
Tujia	Palestinian	0.357188
Tujia	Bedouin	0.428796
Tujia	Mozabite	0.760914
Tujia	BantuKenya	0.557343
Tujia	Yoruba	0.427169
Tujia	Mandenka	0.245658
Tujia	BiakaPygmy	0.849014
Tujia	MbutiPygmy	0.0949264
Tujia	BantuSouthAfrica	0.235579
Tujia	San	1
Tujia	Pathan	0.0686227
Tujia	Tuscan	0.00117075
Tujia	Orcadian	0.00429813
Tujia	Sardinian	0.000598799
Tujia	Russian	0.000542223
Tujia	Italian	0.000315714
Tujia	Kalash	0.000435326
Tujia	Druze	0.000308503
Basque	French	0.211162
Basque	Sardinian	0.139163
Basque	Russian	0.116171
Basque	Adygei	0.171531
Basque	Orcadian	0.0600481
Basque	Italian	0.0677776
Basque	Tuscan	0.0386732
Basque	Druze	0.201719
Basque	Palestinian	0.419264
Basque	Burusho	0.130359
Basque	Pathan	0.0766137
Basque	Sindhi	0.105902
Basque	Bedouin	0.481626
Basque	Hezhen	0.0194648
Basque	Makrani	0.471493
Basque	Brahui	0.0995167
Basque	Balochi	0.0735151
Basque	Uygur	0.0554211
Basque	Mozabite	0.770055
Basque	BantuKenya	0.553745
Basque	Yoruba	0.432301
Basque	Mandenka	0.24861
Basque	BiakaPygmy	0.849686
Basque	MbutiPygmy	0.0960668
Basque	BantuSouthAfrica	0.234463
Basque	San	1
Basque	Hazara	0.034074
Basque	Cambodian	0.00778305
Basque	Mongola	0.00863268
Basque	Yi	0.00578982
Basque	Tu	0.00440894
Basque	Oroqen	0.00473184
Basque	Xibo	0.00414112
Basque	Kalash	0.00608184
Basque	Daur	0.00274473
Basque	Naxi	0.00212813
She	Han	0.315766
She	Mongola	0.298984
She	Tujia	0.0855697
She	Hezhen	0.0849677
She	Xibo	0.199833
She	Yi	0.183696
She	Naxi	0.116507
She	Oroqen	0.215509
She	Cambodian	0.272624
She	Daur	0.127594
She	Tu	0.14889
She	Hazara	0.541182
She	Uygur	0.316654
She	French	0.0947679
She	Makrani	0.539492
She	Sindhi	0.154046
She	Brahui	0.158673
She	Burusho	0.203845
She	Adygei	0.151784
She	Balochi	0.0802018
She	Palestinian	0.357164
She	Bedouin	0.428858
She	Mozabite	0.760909
She	BantuKenya	0.557351
She	Yoruba	0.427166
She	Mandenka	0.245657
She	BiakaPygmy	0.849013
She	MbutiPygmy	0.0949258
She	BantuSouthAfrica	0.235575
She	San	1
She	Pathan	0.0691321
She	Tuscan	0.00118274
She	Orcadian	0.00442003
She	Sardinian	0.000615782
She	Russian	0.000557602
She	Italian	0.000324669
She	Kalash	0.000447673
She	Druze	0.000317253
Japanese	Han	0.296969
Japanese	Daur	0.136679
Japanese	Mongola	0.290317
Japanese	She	0.0737386
Japanese	Tu	0.163268
Japanese	Tujia	0.0800484
Japanese	Yi	0.190866
Japanese	Hezhen	0.0787227
Japanese	Xibo	0.194946
Japanese	Naxi	0.110464
Japanese	Cambodian	0.277238
Japanese	Oroqen	0.209501
Japanese	Hazara	0.54082
Japanese	Uygur	0.316476
Japanese	French	0.0944262
Japanese	Makrani	0.539359
Japanese	Sindhi	0.154602
Japanese	Brahui	0.158652
Japanese	Burusho	0.205054
Japanese	Adygei	0.151728
Japanese	Balochi	0.079913
Japanese	Palestinian	0.357261
Japanese	Bedouin	0.428672
Japanese	Mozabite	0.760946
Japanese	BantuKenya	0.557311
Japanese	Yoruba	0.427187
Japanese	Mandenka	0.245669
Japanese	BiakaPygmy	0.849016
Japanese	MbutiPygmy	0.0949303
Japanese	BantuSouthAfrica	0.23559
Japanese	San	1
Japanese	Pathan	0.0671093
Japanese	Tuscan	0.00114097
Japanese	Orcadian	0.00409517
Japanese	Sardinian	0.000570523
Japanese	Russian	0.000516619
Japanese	Italian	0.000300806
Japanese	Kalash	0.00041477
Japanese	Druze	0.000293936
Colombian	Japanese	0.230009
Colombian	Daur	0.130086
Colombian	Yi	0.165323
Colombian	Uygur	0.308429
Colombian	Hezhen	0.0930074
Colombian	Naxi	0.0921044
Colombian	Hazara	0.473324
Colombian	Burusho	0.256419
Colombian	French	0.149764
Colombian	She	0.0768349
Colombian	Xibo	0.151556
Colombian	Han	0.0872119
Colombian	Mongola	0.157296
Colombian	Tu	0.0727463
Colombian	Tujia	0.0235353
Colombian	Cambodian	0.148145
Colombian	Oroqen	0.116842
Colombian	Makrani	0.537633
Colombian	Sindhi	0.121638
Colombian	Brahui	0.1549
Colombian	Adygei	0.148341
Colombian	Balochi	0.0741816
Colombian	Palestinian	0.362386
Colombian	Bedouin	0.437264
Colombian	Mozabite	0.761034
Colombian	BantuKenya	0.558391
Colombian	Yoruba	0.427236
Colombian	Mandenka	0.245697
Colombian	BiakaPygmy	0.849023
Colombian	MbutiPygmy	0.0949414
Colombian	BantuSouthAfrica	0.234706
Colombian	San	1
Colombian	Pathan	0.0366094
Colombian	Tuscan	0.00071784
Colombian	Orcadian	0.00483826
Colombian	Sardinian	0.000674048
Colombian	Russian	0.000610363
Colombian	Italian	0.000355389
Colombian	Kalash	0.000490032
Colombian	Druze	0.000347272
Pima	Mongola	0.54346
Pima	Colombian	0.351417
Pima	Oroqen	0.24187
Pima	Hazara	0.505852
Pima	Uygur	0.305997
Pima	Cambodian	0.163394
Pima	Pathan	0.125059
Pima	French	0.11914
Pima	Makrani	0.540957
Pima	Sindhi	0.135303
Pima	Brahui	0.1594
Pima	Burusho	0.206439
Pima	Adygei	0.150687
Pima	Balochi	0.0835077
Pima	Palestinian	0.358236
Pima	Bedouin	0.435481
Pima	Mozabite	0.760168
Pima	BantuKenya	0.55842
Pima	Yoruba	0.42675
Pima	Mandenka	0.245418
Pima	BiakaPygmy	0.848959
Pima	MbutiPygmy	0.0948333
Pima	BantuSouthAfrica	0.235056
Pima	San	1
Pima	Tuscan	0.00190889
Pima	Japanese	0.0808293
Pima	Daur	0.0457146
Pima	Yi	0.0580975
Pima	Hezhen	0.0326844
Pima	Naxi	0.0323671
Pima	She	0.0270011
Pima	Xibo	0.0532593
Pima	Han	0.0306478
Pima	Tu	0.0255643
Pima	Tujia	0.00827072
Pima	Orcadian	0.00170025
Pima	Sardinian	0.000236872
Pima	Russian	0.000214492
Pima	Italian	0.00012489
Pima	Kalash	0.000172206
Pima	Druze	0.000122038
Surui	Pima	0.629684
Surui	Colombian	0.591598
Surui	Mongola	0.400458
Surui	Oroqen	0.19557
Surui	Hazara	0.493806
Surui	Uygur	0.306897
Surui	Cambodian	0.157747
Surui	Pathan	0.0923048
Surui	French	0.13048
Surui	Makrani	0.539726
Surui	Sindhi	0.130242
Surui	Brahui	0.157734
Surui	Burusho	0.224947
Surui	Adygei	0.149818
Surui	Balochi	0.0800541
Surui	Palestinian	0.359773
Surui	Bedouin	0.436142
Surui	Mozabite	0.760489
Surui	BantuKenya	0.558409
Surui	Yoruba	0.42693
Surui	Mandenka	0.245521
Surui	BiakaPygmy	0.848983
Surui	MbutiPygmy	0.0948734
Surui	BantuSouthAfrica	0.234926
Surui	San	1
Surui	Tuscan	0.00146783
Surui	Japanese	0.136073
Surui	Daur	0.0769588
Surui	Yi	0.0978049
Surui	Hezhen	0.055023
Surui	Naxi	0.0544888
Surui	She	0.0454554
Surui	Xibo	0.08966
Surui	Han	0.0515944
Surui	Tu	0.0430365
Surui	Tujia	0.0139234
Surui	Orcadian	0.0028623
Surui	Sardinian	0.000398765
Surui	Russian	0.000361089
Surui	Italian	0.000210247
Surui	Kalash	0.000289902
Surui	Druze	0.000205446
Maya	Pima	0.486785
Maya	Surui	0.228571
Maya	Colombian	0.455708
Maya	BantuSouthAfrica	0.322296
Maya	Tuscan	0.115419
Maya	Mongola	0.309322
Maya	Oroqen	0.150997
Maya	Hazara	0.387831
Maya	Uygur	0.241202
Maya	Cambodian	0.121707
Maya	Pathan	0.0712975
Maya	French	0.113518
Maya	Makrani	0.471658
Maya	Sindhi	0.111979
Maya	Brahui	0.137255
Maya	Burusho	0.188306
Maya	Adygei	0.128633
Maya	Balochi	0.0740411
Maya	Palestinian	0.319262
Maya	Bedouin	0.391313
Maya	Mozabite	0.674751
Maya	BantuKenya	0.494031
Maya	Yoruba	0.378798
Maya	Mandenka	0.217841
Maya	BiakaPygmy	0.842683
Maya	MbutiPygmy	0.0841773
Maya	San	1
Maya	Japanese	0.104817
Maya	Daur	0.0592815
Maya	Yi	0.0753392
Maya	Hezhen	0.0423843
Maya	Naxi	0.0419727
Maya	She	0.0350143
Maya	Xibo	0.0690652
Maya	Han	0.0397432
Maya	Tu	0.0331511
Maya	Tujia	0.0107252
Maya	Orcadian	0.00220484
Maya	Sardinian	0.000307169
Maya	Russian	0.000278147
Maya	Italian	0.000161954
Maya	Kalash	0.000223312
Maya	Druze	0.000158255
Yakut	Japanese	0.147332
Yakut	Hazara	0.499209
Yakut	Orcadian	0.0600164
Yakut	Daur	0.101379
Yakut	Uygur	0.294034
Yakut	Yi	0.136763
Yakut	Mongola	0.201556
Yakut	Tujia	0.0570858
Yakut	Hezhen	0.0622795
Yakut	Oroqen	0.150674
Yakut	Xibo	0.134577
Yakut	Colombian	0.0357309
Yakut	Cambodian	0.189377
Yakut	Han	0.16928
Yakut	Russian	0.086989
Yakut	Tu	0.108138
Yakut	Naxi	0.0660283
Yakut	She	0.0130034
Yakut	French	0.107906
Yakut	Makrani	0.536534
Yakut	Sindhi	0.145534
Yakut	Brahui	0.154109
Yakut	Burusho	0.18317
Yakut	Adygei	0.152358
Yakut	Balochi	0.0845567
Yakut	Palestinian	0.358732
Yakut	Bedouin	0.436729
Yakut	Mozabite	0.760848
Yakut	BantuKenya	0.557678
Yakut	Yoruba	0.427132
Yakut	Mandenka	0.245637
Yakut	BiakaPygmy	0.849009
Yakut	MbutiPygmy	0.0949182
Yakut	BantuSouthAfrica	0.235344
Yakut	San	1
Yakut	Pathan	0.056294
Yakut	Tuscan	0.00471001
Yakut	Sardinian	0.0140235
Yakut	Italian	0.00725894
Yakut	Kalash	0.00607863
Yakut	Druze	0.0144453
Melanesian	Cambodian	0.213543
Melanesian	Oroqen	0.170544
Melanesian	Japanese	0.188595
Melanesian	Han	0.174186
Melanesian	Brahui	0.224809
Melanesian	Kalash	0.0764106
Melanesian	Pima	0.0604496
Melanesian	Burusho	0.227295
Melanesian	Russian	0.059021
Melanesian	Yi	0.13959
Melanesian	Daur	0.101115
Melanesian	Naxi	0.087199
Melanesian	She	0.0569817
Melanesian	Hezhen	0.062706
Melanesian	Uygur	0.279915
Melanesian	Tujia	0.0478317
Melanesian	Hazara	0.380652
Melanesian	Sindhi	0.129574
Melanesian	Mozabite	0.760296
Melanesian	Palestinian	0.366698
Melanesian	Makrani	0.53362
Melanesian	Adygei	0.147207
Melanesian	Bedouin	0.446732
Melanesian	BantuKenya	0.558543
Melanesian	Yoruba	0.426822
Melanesian	Mandenka	0.245459
Melanesian	BiakaPygmy	0.848968
Melanesian	MbutiPygmy	0.0948493
Melanesian	BantuSouthAfrica	0.234904
Melanesian	San	1
Melanesian	French	0.0809417
Melanesian	Balochi	0.0702769
Melanesian	Mongola	0.185289
Melanesian	Pathan	0.0551879
Melanesian	Tuscan	0.00224352
Melanesian	Tu	0.0750785
Melanesian	Xibo	0.0976836
Melanesian	Orcadian	0.00326198
Melanesian	Sardinian	0.00463314
Melanesian	Italian	0.00529122
Melanesian	Druze	0.00813652
Melanesian	Colombian	0.0212431
Karitiana	Colombian	0.565992
Karitiana	Maya	0.327189
Karitiana	Pima	0.553857
Karitiana	Surui	0.246281
Karitiana	Japanese	0.130183
Karitiana	Daur	0.0736279
Karitiana	Yi	0.0935717
Karitiana	Uygur	0.285473
Karitiana	Hezhen	0.0526415
Karitiana	Naxi	0.0521304
Karitiana	Hazara	0.458187
Karitiana	Burusho	0.214412
Karitiana	French	0.125821
Karitiana	She	0.043488
Karitiana	Xibo	0.0857793
Karitiana	Han	0.0493612
Karitiana	Mongola	0.359412
Karitiana	Tu	0.0411738
Karitiana	Tujia	0.0133208
Karitiana	Cambodian	0.145512
Karitiana	Oroqen	0.177352
Karitiana	Makrani	0.517358
Karitiana	Sindhi	0.12387
Karitiana	Brahui	0.150903
Karitiana	Adygei	0.142818
Karitiana	Balochi	0.0778156
Karitiana	Palestinian	0.346639
Karitiana	Bedouin	0.421526
Karitiana	Mozabite	0.732462
Karitiana	BantuKenya	0.537344
Karitiana	Yoruba	0.411196
Karitiana	Mandenka	0.236473
Karitiana	BiakaPygmy	0.846923
Karitiana	MbutiPygmy	0.0913769
Karitiana	BantuSouthAfrica	0.263502
Karitiana	San	1
Karitiana	Pathan	0.08286
Karitiana	Tuscan	0.0387169
Karitiana	Orcadian	0.00273842
Karitiana	Sardinian	0.000381506
Karitiana	Russian	0.00034546
Karitiana	Italian	0.000201147
Karitiana	Kalash	0.000277354
Karitiana	Druze	0.000196553
Papuan	Melanesian	0.699064
Papuan	Cambodian	0.450216
Papuan	Oroqen	0.119221
Papuan	Japanese	0.13184
Papuan	Han	0.121767
Papuan	Brahui	0.204649
Papuan	Kalash	0.0534159
Papuan	Pima	0.0422582
Papuan	Burusho	0.278388
Papuan	Russian	0.0412595
Papuan	Yi	0.0975821
Papuan	Daur	0.0706861
Papuan	Naxi	0.0609577
Papuan	She	0.0398339
Papuan	Hezhen	0.0438355
Papuan	Uygur	0.259679
Papuan	Tujia	0.0334374
Papuan	Hazara	0.355874
Papuan	Sindhi	0.165009
Papuan	Mozabite	0.761929
Papuan	Palestinian	0.370072
Papuan	Makrani	0.527846
Papuan	Adygei	0.144884
Papuan	Bedouin	0.435903
Papuan	BantuKenya	0.556389
Papuan	Yoruba	0.427739
Papuan	Mandenka	0.245986
Papuan	BiakaPygmy	0.849088
Papuan	MbutiPygmy	0.095053
Papuan	BantuSouthAfrica	0.23589
Papuan	San	1
Papuan	French	0.0709027
Papuan	Balochi	0.061154
Papuan	Mongola	0.129529
Papuan	Pathan	0.0385799
Papuan	Tuscan	0.00156836
Papuan	Tu	0.0524847
Papuan	Xibo	0.0682871
Papuan	Orcadian	0.00228033
Papuan	Sardinian	0.00323886
Papuan	Italian	0.0036989
Papuan	Druze	0.00568795
Papuan	Colombian	0.0148503
Dai	Han	0.352919
Dai	She	0.0890964
Dai	Yi	0.207565
Dai	Tujia	0.086418
Dai	Tu	0.174222
Dai	Xibo	0.214569
Dai	Cambodian	0.294436
Dai	Naxi	0.124054
Dai	Japanese	0.191541
Dai	Daur	0.13015
Dai	Hezhen	0.06518
Dai	Oroqen	0.203916
Dai	Mongola	0.245306
Dai	Hazara	0.54045
Dai	Uygur	0.316845
Dai	French	0.0930877
Dai	Makrani	0.538825
Dai	Sindhi	0.15658
Dai	Brahui	0.15838
Dai	Burusho	0.209412
Dai	Adygei	0.151553
Dai	Balochi	0.0787
Dai	Palestinian	0.357568
Dai	Bedouin	0.427926
Dai	Mozabite	0.761107
Dai	BantuKenya	0.55715
Dai	Yoruba	0.427277
Dai	Mandenka	0.245721
Dai	BiakaPygmy	0.849028
Dai	MbutiPygmy	0.0949505
Dai	BantuSouthAfrica	0.235647
Dai	San	1
Dai	Pathan	0.0566982
Dai	Tuscan	0.000961428
Dai	Orcadian	0.00339067
Dai	Sardinian	0.000472376
Dai	Russian	0.000427744
Dai	Italian	0.000249058
Dai	Kalash	0.000343417
Dai	Druze	0.00024337
Lahu	Han	0.373348
Lahu	Japanese	0.222071
Lahu	She	0.0937734
Lahu	Tu	0.194885
Lahu	Tujia	0.100117
Lahu	Yi	0.226323
Lahu	Dai	0.0685666
Lahu	Naxi	0.139351
Lahu	Cambodian	0.300293
Lahu	Hezhen	0.0859696
Lahu	Oroqen	0.209683
Lahu	Daur	0.096841
Lahu	Mongola	0.25169
Lahu	Xibo	0.16802
Lahu	Hazara	0.536716
Lahu	Uygur	0.314938
Lahu	French	0.092869
Lahu	Makrani	0.538579
Lahu	Sindhi	0.157466
Lahu	Brahui	0.158417
Lahu	Burusho	0.211023
Lahu	Adygei	0.151454
Lahu	Balochi	0.0784497
Lahu	Palestinian	0.357803
Lahu	Bedouin	0.427875
Lahu	Mozabite	0.761136
Lahu	BantuKenya	0.557103
Lahu	Yoruba	0.427293
Lahu	Mandenka	0.24573
Lahu	BiakaPygmy	0.84903
Lahu	MbutiPygmy	0.0949541
Lahu	BantuSouthAfrica	0.235671
Lahu	San	1
Lahu	Pathan	0.0582681
Lahu	Tuscan	0.00102423
Lahu	Orcadian	0.00447215
Lahu	Sardinian	0.000623043
Lahu	Russian	0.000564177
Lahu	Italian	0.000328497
Lahu	Kalash	0.000452952
Lahu	Druze	0.000320994
Han-NChina	Han	0.266885
Han-NChina	Japanese	0.160547
Han-NChina	Mongola	0.249257
Han-NChina	Tujia	0.0718282
Han-NChina	Tu	0.142575
Han-NChina	She	0.0626082
Han-NChina	Yi	0.164977
Han-NChina	Dai	0.04228
Han-NChina	Oroqen	0.185305
Han-NChina	Hezhen	0.0662291
Han-NChina	Naxi	0.097646
Han-NChina	Xibo	0.163444
Han-NChina	Lahu	0.0315162
Han-NChina	Cambodian	0.235648
Han-NChina	Yakut	0.0891956
Han-NChina	Hazara	0.557283
Han-NChina	Orcadian	0.0443929
Han-NChina	Daur	0.100142
Han-NChina	Uygur	0.288228
Han-NChina	French	0.10504
Han-NChina	Makrani	0.540997
Han-NChina	Sindhi	0.155857
Han-NChina	Brahui	0.162376
Han-NChina	Burusho	0.198196
Han-NChina	Adygei	0.154841
Han-NChina	Balochi	0.085273
Han-NChina	Palestinian	0.357553
Han-NChina	Bedouin	0.428661
Han-NChina	Mozabite	0.760426
Han-NChina	BantuKenya	0.557566
Han-NChina	Yoruba	0.426895
Han-NChina	Mandenka	0.245501
Han-NChina	BiakaPygmy	0.848978
Han-NChina	MbutiPygmy	0.0948655
Han-NChina	BantuSouthAfrica	0.235614
Han-NChina	San	1
Han-NChina	Pathan	0.0618822
Han-NChina	Tuscan	0.00269013
Han-NChina	Sardinian	0.0066897
Han-NChina	Russian	0.012684
Han-NChina	Italian	0.00351508
Han-NChina	Kalash	0.00449624
Han-NChina	Druze	0.00409058
Han-NChina	Colombian	0.00318704
Miao	Han	0.338215
Miao	Japanese	0.197063
Miao	Mongola	0.297824
Miao	Tu	0.173903
Miao	Han-NChina	0.0583096
Miao	Yi	0.203026
Miao	Dai	0.0630862
Miao	Tujia	0.089147
Miao	She	0.0812994
Miao	Xibo	0.201598
Miao	Naxi	0.121871
Miao	Lahu	0.046743
Miao	Hezhen	0.0707858
Miao	Oroqen	0.201191
Miao	Cambodian	0.268896
Miao	Daur	0.0878916
Miao	Hazara	0.543029
Miao	Uygur	0.315303
Miao	French	0.0954203
Miao	Makrani	0.539667
Miao	Sindhi	0.153924
Miao	Brahui	0.158943
Miao	Burusho	0.203128
Miao	Adygei	0.151975
Miao	Balochi	0.080603
Miao	Palestinian	0.357132
Miao	Bedouin	0.428865
Miao	Mozabite	0.760866
Miao	BantuKenya	0.55738
Miao	Yoruba	0.427142
Miao	Mandenka	0.245643
Miao	BiakaPygmy	0.84901
Miao	MbutiPygmy	0.0949203
Miao	BantuSouthAfrica	0.23557
Miao	San	1
Miao	Pathan	0.0690446
Miao	Tuscan	0.00125064
Miao	Orcadian	0.00606993
Miao	Sardinian	0.000875089
Miao	Russian	0.00117879
Miao	Italian	0.000460686
Miao	Kalash	0.00061478
Miao	Druze	0.000488402
Miao	Yakut	0.00520096
Miao	Colombian	0.000185835
